# Supplementary material for: Greater agility increases probability of survival in the endangered northern quoll
Source: Oxford University Press journal article supplement (doi:10.1242/jeb.218503), 2020-01-01
Supplement: jeb218503supp.pdf [file jeb218503supp.pdf]

**Supplementary Tables****Table S1: The ANOVA results for sprint speed for female northern quolls ( $n = 76$ ) (*Dasyurus hallucatus*).**

|                | Df | Sum Sq | Mean Sq | F-value | P-value |
|----------------|----|--------|---------|---------|---------|
| Mass           | 1  | 0.17   | 0.17    | 0.54    | 0.47    |
| Body shape     | 1  | 0.04   | 0.04    | 0.11    | 0.74    |
| Body condition | 1  | 0.45   | 0.45    | 1.42    | 0.24    |
| Age tested     | 2  | 0.39   | 0.19    | 0.62    | 0.54    |
| Residuals      | 70 | 21.92  | 0.31    |         |         |

The ANOVA results of female northern quolls contained sprint speed as the response variable and mass, body shape, body condition and age tested as predictor variables.

**Table S2: The ANOVA results for acceleration for female northern quolls ( $n = 76$ ) (*Dasyurus hallucatus*).**

|                | Df | Sum Sq | Mean Sq | F-value | P-value |
|----------------|----|--------|---------|---------|---------|
| Mass           | 1  | 8.21   | 8.21    | 2.87    | 0.09    |
| Body shape     | 1  | 1.04   | 1.04    | 0.36    | 0.55    |
| Body condition | 1  | 2.62   | 2.62    | 0.92    | 0.34    |
| Age tested     | 2  | 2.19   | 1.10    | 0.38    | 0.68    |
| Residuals      | 70 | 200.09 | 2.86    |         |         |

The ANOVA results of female northern quolls contained acceleration as the response variable and mass, body shape, body condition and age tested as predictor variables.

**Table S3: The ANOVA results for maximum angular velocity around a 90° corner for female northern quolls ( $n = 76$ ) (*Dasyurus hallucatus*).**

|                | Df | Sum Sq   | Mean Sq  | F-value  | P-value |
|----------------|----|----------|----------|----------|---------|
| Mass           | 1  | 24       | 24.2     | 8.00E-04 | 0.98    |
| Body shape     | 1  | 7475     | 7475.4   | 0.25     | 0.62    |
| Body condition | 1  | 633      | 632.7    | 0.02     | 0.88    |
| Age tested     | 2  | 3.49E+04 | 1.74E+04 | 0.58     | 0.56    |
| Residuals      | 70 | 2.10E+06 | 2.99E+04 |          |         |

The ANOVA results of female northern quolls contained maximum angular velocity around a 90° corner as the response variable and mass, body shape, body condition and age tested as predictor variables.

**Table S4: The ANOVA results for forward velocity around a 90° corner for female northern quolls ( $n = 76$ ) (*Dasyurus hallucatus*).**

|                | Df | Sum Sq | Mean Sq | F-value | P-value |
|----------------|----|--------|---------|---------|---------|
| Mass           | 1  | 0.04   | 0.04    | 0.26    | 0.61    |
| Body shape     | 1  | 0.09   | 0.09    | 0.68    | 0.41    |
| Body condition | 1  | 0.01   | 0.01    | 0.08    | 0.78    |
| Age tested     | 2  | 1.47   | 0.73    | 5.22    | < 0.01* |
| Residuals      | 70 | 9.83   | 0.14    |         |         |

The ANOVA results of female northern quolls contained forward velocity around a 90° corner as the response variable and mass, body shape, body condition and age tested as predictor variables.

Asterisks indicate significance.

**Table S5: The ANOVA results for forward velocity around a 135° corner for female northern quolls ( $n = 76$ ) (*Dasyurus hallucatus*).**

|                 | Df | Sum Sq | Mean Sq | F-value | P-value |
|-----------------|----|--------|---------|---------|---------|
| Mass            | 1  | 0.10   | 0.10    | 0.89    | 0.35    |
| Body shape      | 1  | 0.18   | 0.18    | 1.69    | 0.20    |
| Body condition  | 1  | 0.24   | 0.24    | 2.21    | 0.14    |
| Age tested      | 2  | 1.46   | 0.73    | 6.72    | < 0.01* |
| Mass*Age tested | 2  | 0.59   | 0.29    | 2.71    | 0.07*   |
| Residuals       | 68 | 7.37   | 0.11    |         |         |

The ANOVA results of female northern quolls contained forward velocity around a 135° corner as the response variable and mass, body shape, body condition and age tested as predictor variables.

Asterisks indicate significance.
